# Supplementary material
Source: PubMed Central journal article supplement (PMC8702490)
Supplement: NIHMS1751338-supplement-1.pdf [file NIHMS1751338-supplement-1.pdf]

## Immunoglobulin enhancers increase RNA polymerase 2 stalling at somatic hypermutation target sequences

Alina Tarsalainen, Yaakov Maman, Fei-Long Meng, Minna K. Kyläniemi, Anni Soikkeli, Paulina Budzynska, Jessica J. McDonald, Filip Šenigl, Frederic W. Alt, David G. Schatz, and Jukka Alinikula

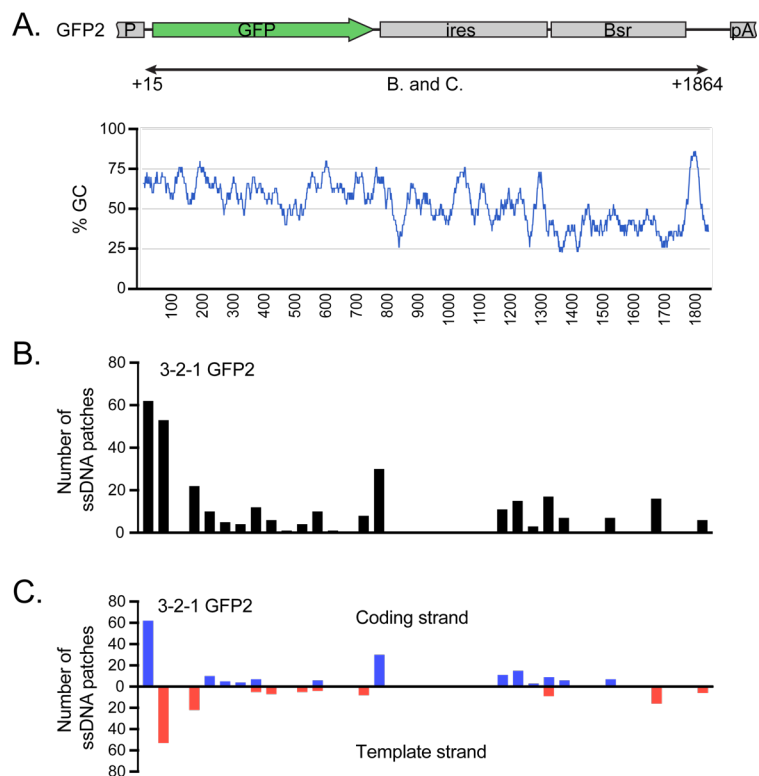

**Figure S1.** The effect of 3-2-1 DIVAC on ssDNA patch location

**A.** The location (upper panel) and GC content (bottom panel) of the region along the *GFP2* transcription unit in which the ssDNA was analyzed for B and C. The GC content is plotted with a 30 bp window.

**B.** Location of ssDNA patch centers in *3-2-1 GFP2* reporter plotted in bins of 50 bp.

**C.** The location of ssDNA patches on the coding strand (blue, above the x-axis) and template strand (red, below the x-axis) of the *3-2-1 GFP2* reporter. The locations are plotted in bins of 50 bp.

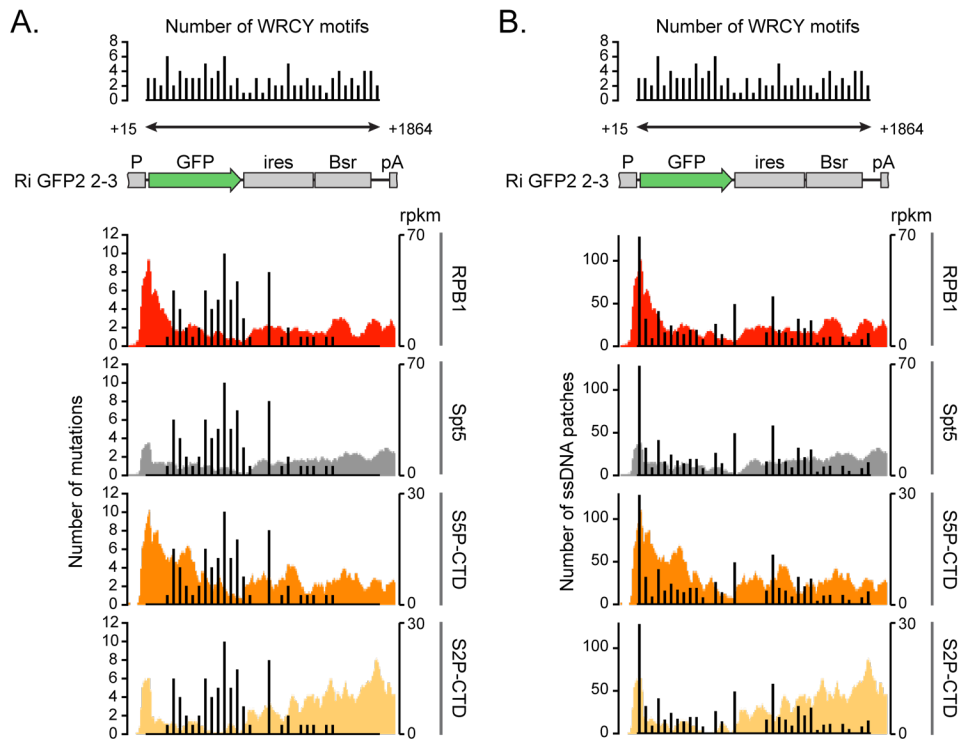

**Figure S2.** Colocalization of Pol2, mutations and ssDNA patches

Comparison of the ChIP-seq signal (from Figure 5A, left y axes) with the location of AID-induced mutations (A) and the location of ssDNA patches (B) at the *Ri GFP2 2-3* reporter plotted in bins of 50 bp (y axes). The location of AID hotspot motifs WRCY/RGYW along the sequenced region (TSS +15 bp to +1,864 bp) is shown at the top.
